# Supplementary material for: Urokinase System in Pathogenesis of Pulmonary Fibrosis: A Hidden Threat of COVID-19
Source: MDPI journal article supplement (doi:10.3390/ijms24021382), 2023-01-10
Supplement: s1 [file s1]

## Supplementary figures

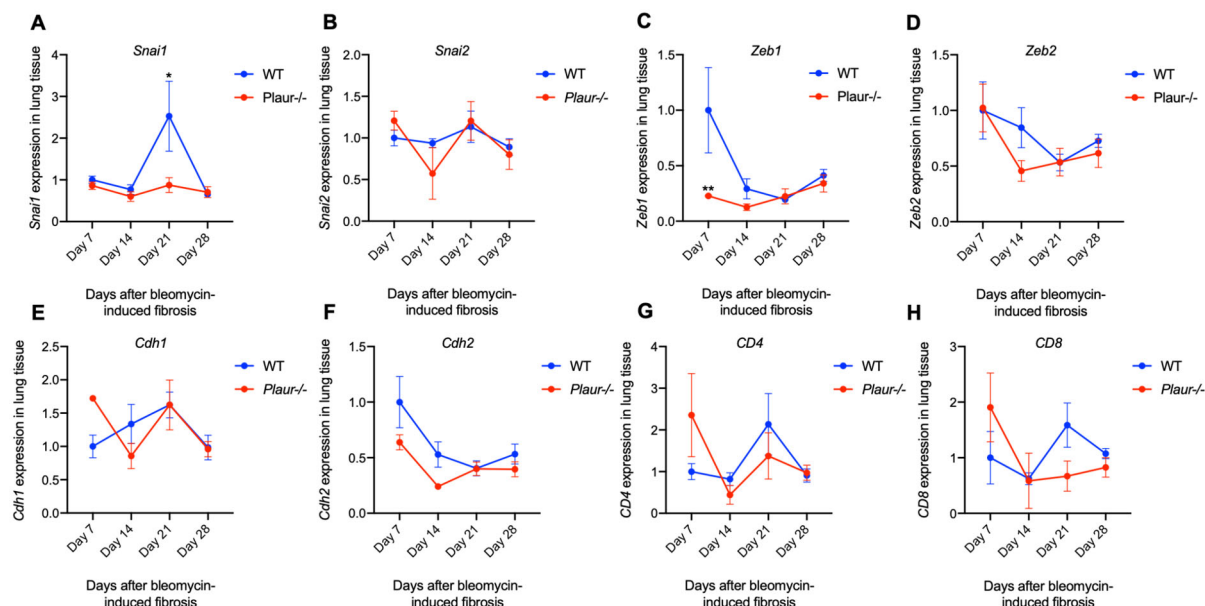

**Figure S1.** Expression of EMT and T lymphocyte markers in lung tissue samples of wild-type (WT) and *Plaur*-deficient (*Plaur*<sup>-/-</sup>) mice after instillation with bleomycin. (A) *Snai1*, (B) *Twist2*, (C) *Zeb1*, (D) *Zeb2*, (E) *Cdh1*, (F) *Cdh2*, (G) *CD4*, (H) *CD8* mRNA expression analyzed by RT-qPCR. The mRNA level was normalized to *Rpl13a* expression as a housekeeping gene, the normalization was carried out assuming the mean level of transcript in WT cells as 1. Data are presented as the mean  $\pm$  SEM. \*  $p < 0.05$ , 2-way ANOVA, Holm-Šidák's test.

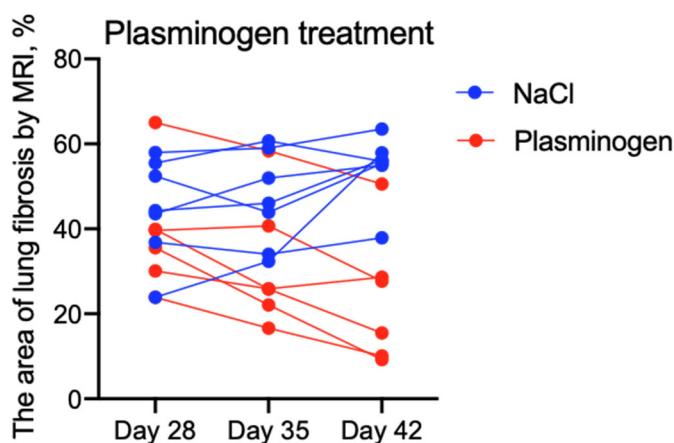

**Figure S2.** Individual values of the % of lung tissue with fibrosis at day 28, 35 or 42 of bleomycin intratracheal instillation in *Plaur*<sup>-/-</sup> mice, treated with 1 mg plasminogen or isotonic NaCl (control) intravenously at day 21.

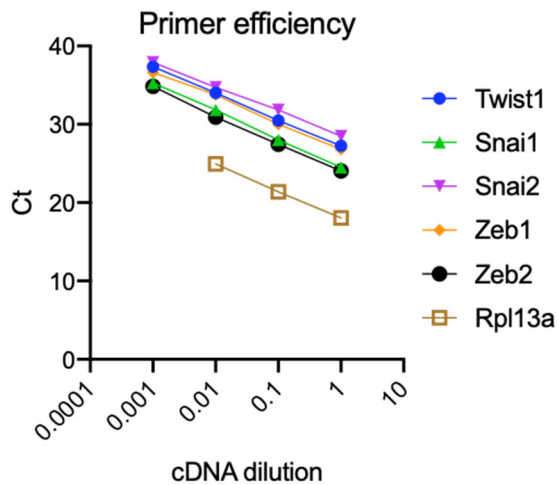

**Figure S3.** Analysis of primer efficiency performed by plotting the cycle threshold value (Ct) against the serial 1:10 dilution of the cDNA sample.

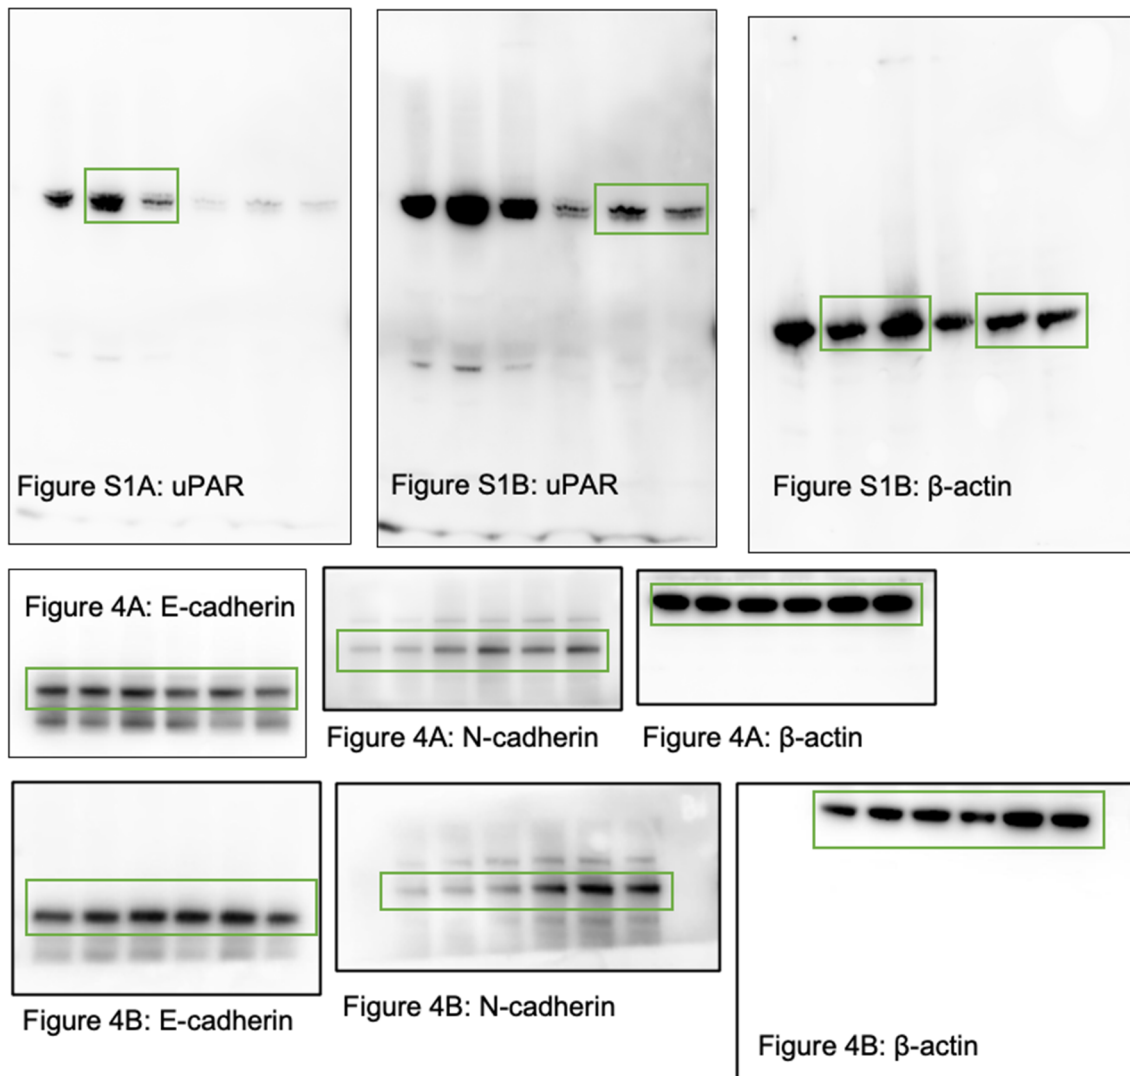

**Figure S4.** The original uncropped western blot images.

## Supplementary tables

**Table S1.** *PLAU* and *PLAUR* minimal, mean, median, interquartile range, maximal expression levels in control, COVID-19 and pulmonary fibrosis lung cells.

**Table S2.** shRNA sequences used for cloning.

| DNA oligo            | Sequence (5' → 3')                                         |
|----------------------|------------------------------------------------------------|
| <i>PLAUR</i> shRNA F | CCGGGCCGTTACCTCGAATGCATTTCTCGAGAAATGCATTGAGGTAACGGCTTTTGG  |
| <i>PLAUR</i> shRNA R | AATTCAAAAAGCCGTTACCTCGAATGCATTTCTCGAGAAATGCATTGAGGTAACGGC  |
| scramble shRNA F     | CCGGCCTAAGGTTAAGTCGCCCTCGCTCGAGCGAGGGCGACTTAACCTTAGGTTTTTG |
| scramble shRNA R     | AATTCAAAAACCTAAGGTTAAGTCGCCCTCGCTCGAGCGAGGGCGACTTAACCTTAGG |

**Table S3.** The murine cDNA primers used in the study.

| Primer                         | Sequence (5' → 3')      | Primer efficiency | Reference |
|--------------------------------|-------------------------|-------------------|-----------|
| <i>The murine cDNA primers</i> |                         |                   |           |
| <i>Acta2</i> F                 | CGAAACCACCTATAACAGCATCA |                   | [78]      |
| <i>Acta2</i> R                 | GCGTTCTGGAGGGGCAAT      |                   |           |
| <i>Cdh1</i> F                  | CAGGTCTCCTCATGGCTTTGC   |                   | [79]      |
| <i>Cdh1</i> R                  | CTTCCGAAAAGAAGGCTGTCC   |                   |           |
| <i>Cdh2</i> F                  | AGCGCAGTCTTACCGAAGG     |                   | [79]      |
| <i>Cdh2</i> R                  | TCGCTGCTTTCATACTGAACTTT |                   |           |
| <i>Ilf6</i> F                  | GCCCACCAAGAACGATAGTCA   |                   |           |
| <i>Ilf6</i> R                  | ACTGGATGGAAGTCTCTT GC   |                   |           |
| <i>Plau</i> F                  | ATGGAAATGGTGACTCTTACCGA |                   |           |
| <i>Plau</i> R                  | TGGGCATTGTAGGGTTTCTGA   |                   |           |
| <i>Rpl13a</i> F                | CCCCAGGTAAGCAAACCTTTCTG | 1.95              |           |
| <i>Rpl13a</i> R                | CCCCACAAGACCAAGAGAGG    |                   |           |

|                 |                          |      |  |
|-----------------|--------------------------|------|--|
| <i>Snai1</i> F  | CTGCTTCGAGCCATAGAACTAAAG | 1.98 |  |
| <i>Snai1</i> R  | GAGGGGAACTATTGCATAGTCTGT |      |  |
| <i>Snai2</i> F  | CTCACCTCGGGAGCATACAGC    | 2.10 |  |
| <i>Snai2</i> R  | TGAAGTGTCAGAGGAAGGCGGG   |      |  |
| <i>Twist1</i> F | CGGGTCATGGCTAACGTG       | 1.98 |  |
| <i>Twist1</i> R | CAGCTTGCCATCTTGGAGTC     |      |  |
| <i>Twist2</i> F | CGCTACAGCAAGAAATCGAGC    |      |  |
| <i>Twist2</i> R | GCTGAGCTTGTCAGAGGGG      |      |  |
| <i>Zeb1</i> F   | GCTGGCAAGACAACGTGAAAG    | 2.00 |  |
| <i>Zeb1</i> R   | GCCTCAGGATAAATGACGGC     |      |  |
| <i>Zeb2</i> F   | CCACGCAGTGAGCATCGAA      | 1.90 |  |
| <i>Zeb2</i> R   | CAGGTGGCAGGTCATTTTCTT    |      |  |
